# Supplementary material
Source: PubMed Central journal article supplement (PMC1440844)
Supplement: 7601051s2.pdf [file 7601051s2.pdf]

A

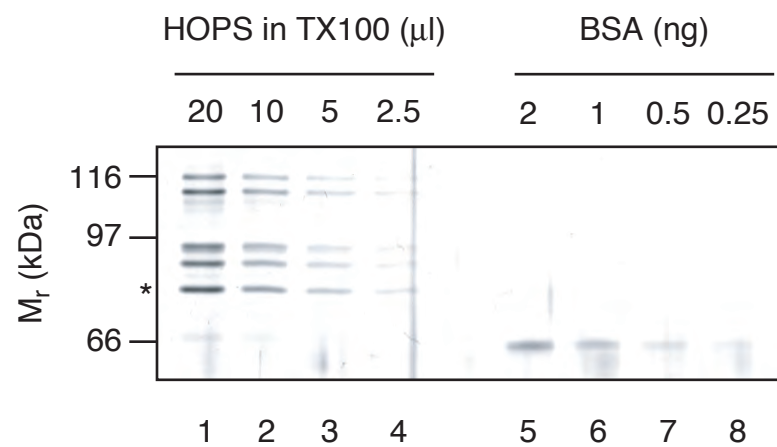

B

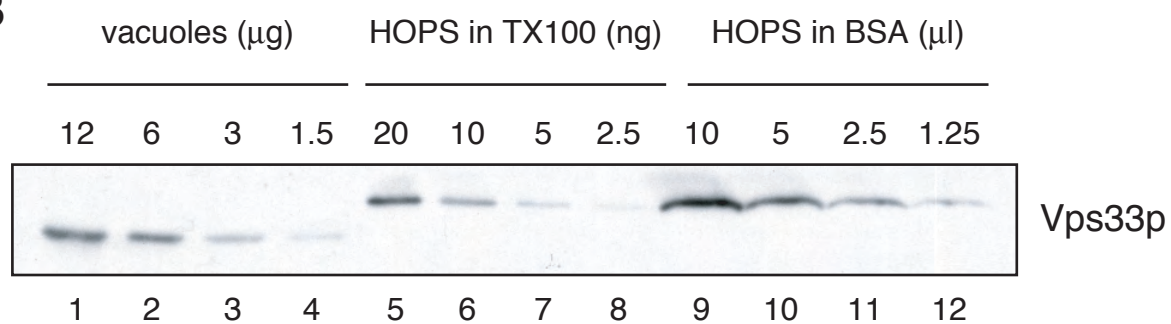

**Figure S2** Quantification of pure HOPS complex by comparison of HOPS in lysis buffer containing Triton X-100 and in HOPS buffer containing BSA. **(A)** Pure HOPS complex in lysis buffer (lane 1, 20  $\mu\text{l}$ ; lane 2, 10  $\mu\text{l}$ ; lane 3, 5  $\mu\text{l}$ ; lane 4, 2.5  $\mu\text{l}$ ) and BSA (lane 5, 2 ng; lane 6, 1 ng; lane 7, 0.5 ng; lane 8, 0.25 ng) were subjected to SDS-PAGE and silver staining. The concentration of Vps33p (marked by an asterisk) was estimated by densitometry to be 0.13 ng/ $\mu\text{l}$ . If we assume that the HOPS complex contains one copy of each subunit, the concentration of HOPS in lysis buffer is 1.0 ng/ $\mu\text{l}$ , or 1.6 nM. **(B)** Vacuoles (lane 1, 12  $\mu\text{g}$ ; lane 2, 6  $\mu\text{g}$ ; lane 3, 3  $\mu\text{g}$ ; lane 4, 1.5  $\mu\text{g}$ ), pure HOPS complex in lysis buffer (lane 5, 20 ng; lane 6, 10 ng; lane 7, 5 ng; lane 8, 2.5 ng), and pure HOPS complex in HOPS buffer with BSA (lane 9, 10  $\mu\text{l}$ ; lane 10, 5  $\mu\text{l}$ ; lane 11, 2.5  $\mu\text{l}$ ; lane 12, 1.25  $\mu\text{l}$ ) were subjected to SDS-PAGE and immunoblotting for Vps33p. The concentration of Vps33p in the HOPS complex in HOPS buffer was estimated by densitometry to be 1.1 ng/ $\mu\text{l}$ . Again assuming that HOPS contains one copy of each subunit, the concentration of HOPS complex in HOPS buffer is 8.3 ng/ $\mu\text{l}$ , or 13 nM. The amount of Vps33p in 1  $\mu\text{g}$  of vacuole extract was estimated by densitometry to be 0.22 ng, corresponding to 1.7 ng of HOPS complex per  $\mu\text{g}$  of vacuole extract, using the assumption that HOPS contains one copy of each subunit. Thus, a standard fusion reaction without added HOPS would contain approximately 10 ng HOPS complex. In our standard HOPS fusion assay (containing 5  $\mu\text{l}$  of added pure HOPS complex) we therefore added approximately 42 ng pure HOPS, 4 times the amount of HOPS present in a standard fusion reaction.
