# Supplementary material
Source: PubMed Central journal article supplement (PMC1440844)
Supplement: 7601051s4.pdf [file 7601051s4.pdf]

Figure S4

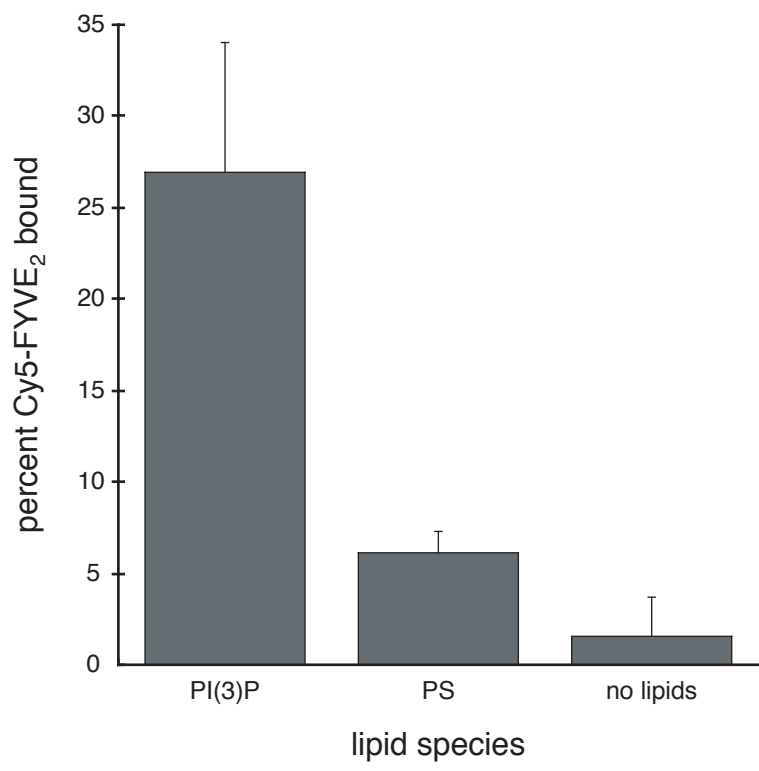

**Figure S4** PI(3)P-containing liposomes bind a tandem FYVE domain construct. PS- or PI(3)P-containing liposomes (20  $\mu$ l; 3.2 mM final total lipid concentration) made as described in Figure 6B, or RB alone, were incubated with a FYVE<sub>2</sub> construct (Gillooly et al., 2000) that had been labelled with Cy5-maleimide (GE), and 20  $\mu$ l of the 1.8 M sucrose solution described in Figure 6B. After a 30 min. ice incubation, sucrose gradients were poured and the gradients were centrifuged as described in Figure 6B. Liposomes (40  $\mu$ l) were harvested, and recovered lipids and Cy5-FYVE<sub>2</sub> were quantified by fluorimetry ( $\lambda_{\text{ex}}/\lambda_{\text{em}}$  510/580 nm for Rh-DHPE, 630/680 nm for Cy5-FYVE<sub>2</sub>); reported Cy5-FYVE<sub>2</sub> recovery was corrected for lipid recovery. Means and standard deviations for 3 independent experiments are shown.
